# Supplementary material for: Human Globozoospermia-Related Gene Spata16 Is Required for Sperm Formation Revealed by CRISPR/Cas9-Mediated Mouse Models
Source: PubMed Central journal article supplement (PMC5666888; doi:10.3390/ijms18102208), 2017-10-21
Supplement: ijms-18-02208-s001.pdf [file ijms-18-02208-s001.pdf]

# Figure S1 (Fujihara et al)

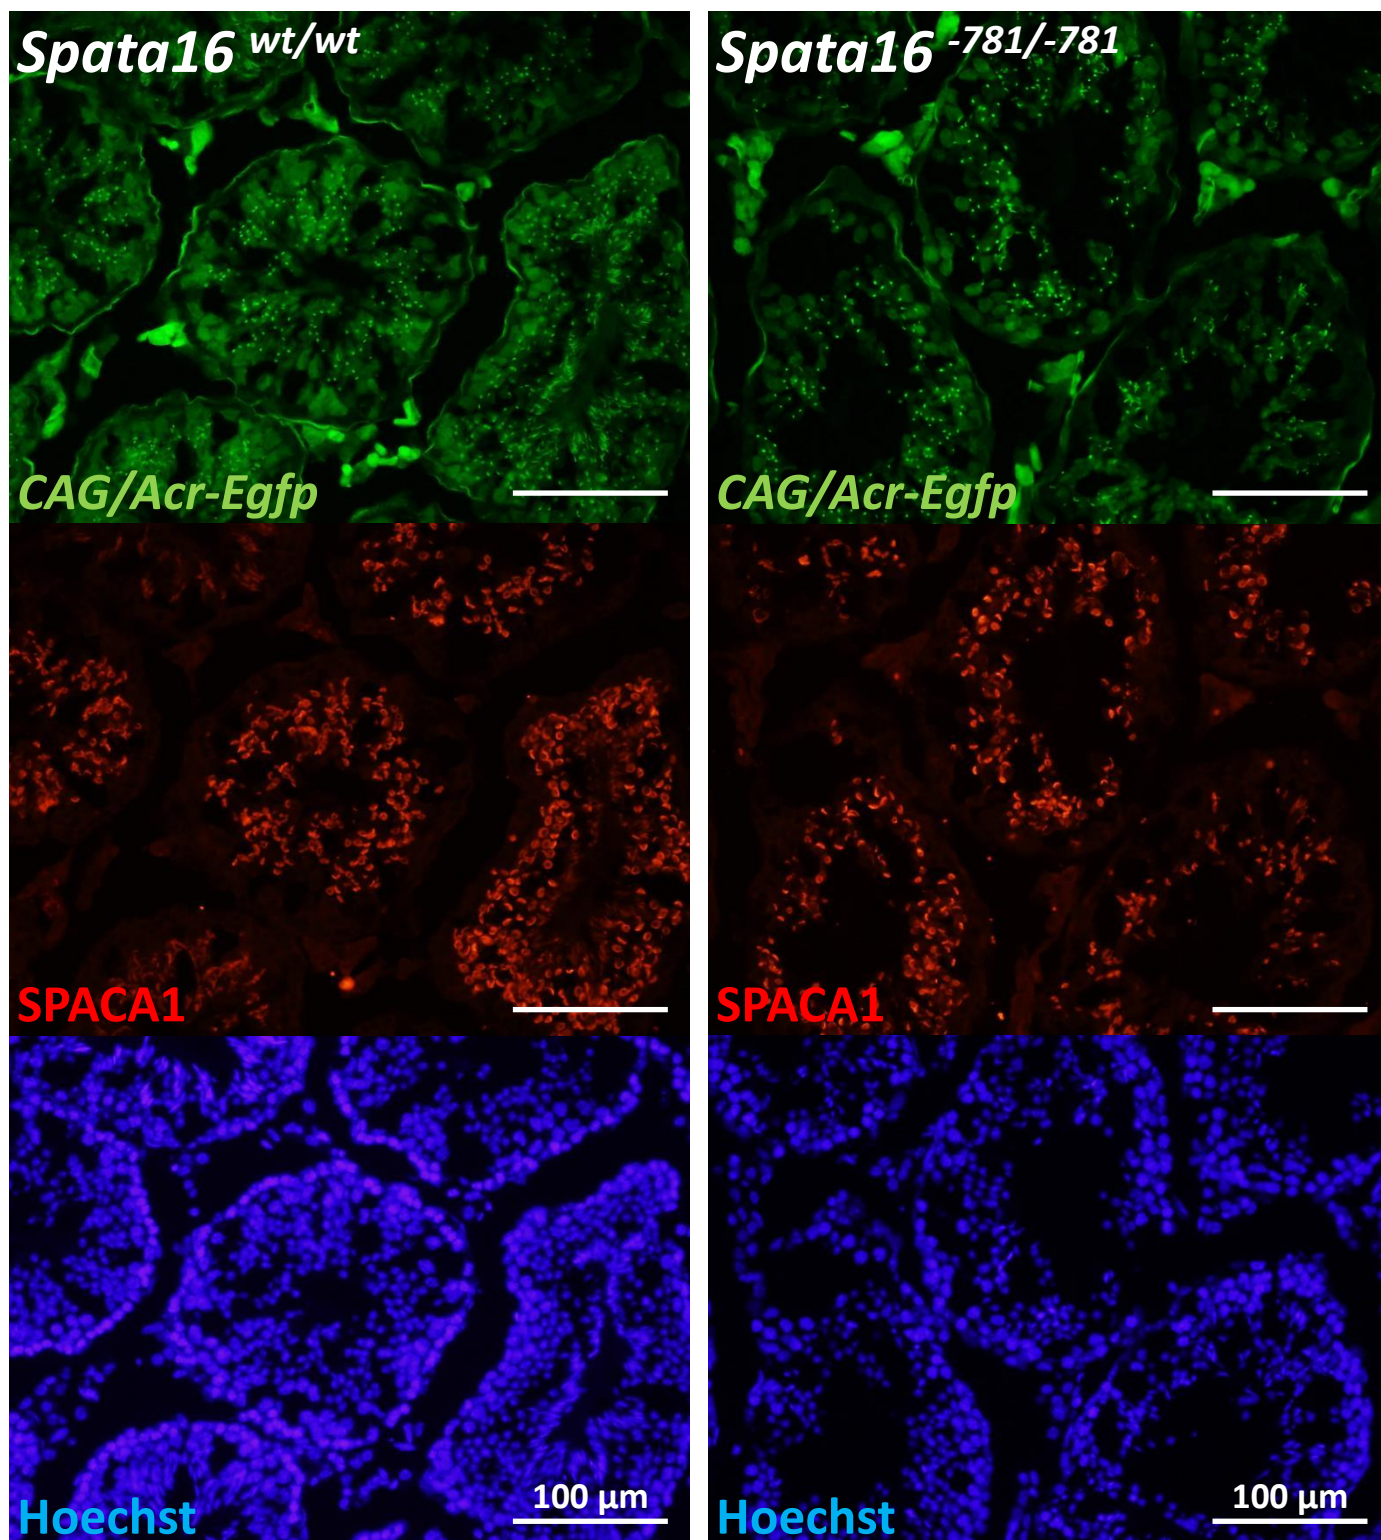

**Figure S1. Histological sections of wild-type and *Spata16*<sup>-781/-781</sup> testes.** Acrosomal formation was observed using *CAG/Acr-EGFP* transgenic mouse testis. Red signals indicate the acrosomal membrane protein SPACA1 by immunostaining. Nuclei were stained with Hoechst 33342 (blue). Scale bars: 100 μm.

## Figure S2 (Fujihara et al)

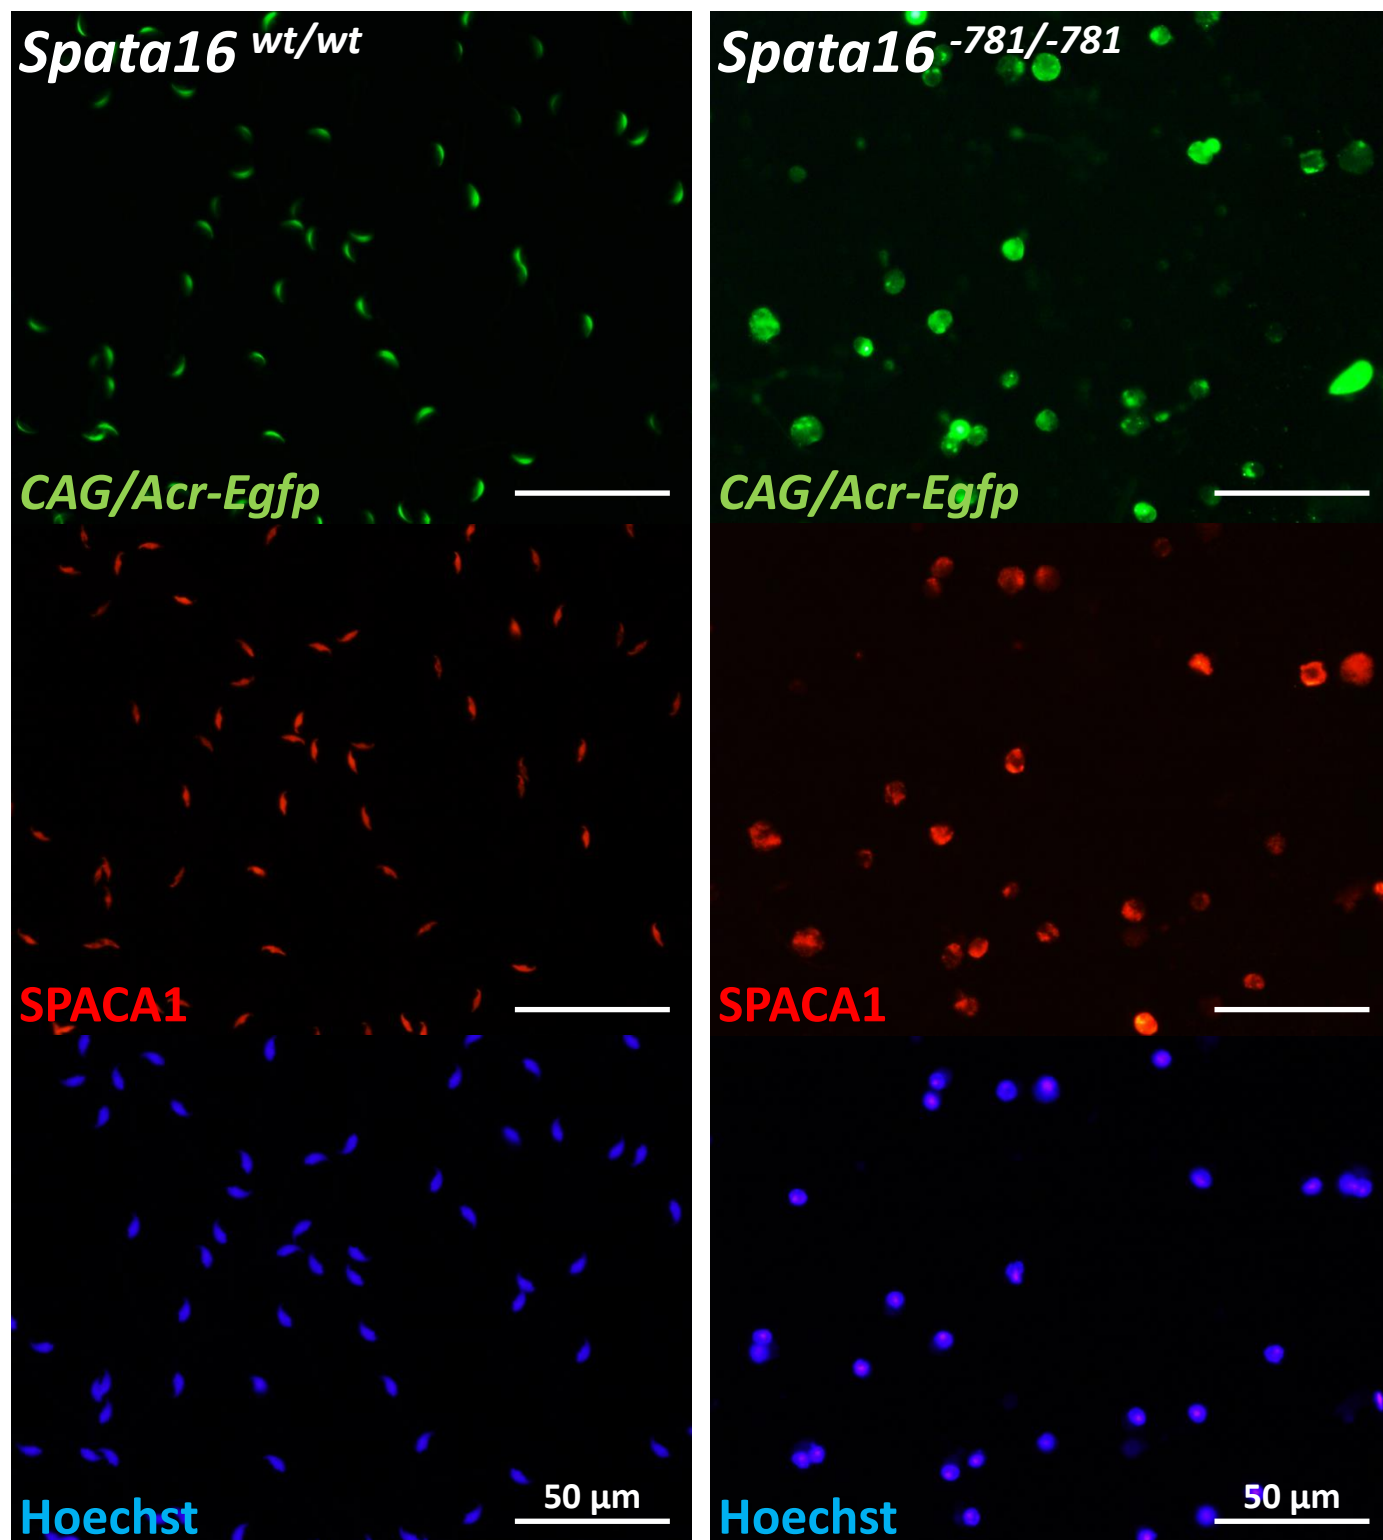

**Figure S2. Observation of extracted cells from cauda epididymis in wild-type and *Spata16*<sup>-781/-781</sup> mice.**

Acrosomal formation was observed using *CAG/Acr-EGFP* transgenic mouse testis. Red signals indicate the acrosomal membrane protein SPACA1 by immunostaining. Double-positive cells were haploid germ cells with acrosome, round spermatid and spermatozoa. The testicular remnants included round spermatids migrated from testis to the cauda epididymis in *Spata16*<sup>-781/-781</sup> mice. Nuclei were stained with Hoechst 33342 (blue). Scale bars: 50 μm.

## Figure S3 (Fujihara et al)

```
Human SPATA16 intron4 (1-200) 1 GTATGTTTGTTTTAACTTTTGTGAGGATTATATCAAGTCAAATTAATTTTATTCTCAA 60
Mouse Spata16 intron4 (1-200) 1 GTATGTTTGTTTACAACCTTTC-TGAAAGATTATTTAAAGTTAAATTAATTTTACCCTCAGA 59

Human SPATA16 intron4 (1-200) 61 TTCTGGTAATAGCATAACAGAACTCTCCATTTCTCTCATGGAATATGATTTTATCCAAAT 120
Mouse Spata16 intron4 (1-200) 60 TTCTGGTAATAGCATAAGAGGACATTCATTTCTCTCATGGAATATGATTTTATCCGAAT 119

Human SPATA16 intron4 (1-200) 121 TATTGTCT-ATCAACGTCAAACCAGCAATTATTGACTATCTTTCTCTTTAATTAAAGCTA 179
Mouse Spata16 intron4 (1-200) 120 TATTGTCTTATAAATGTCAAGCCAACAATTATTGAGTATCTTTTCTTTAATTAAAGCTA 179

Human SPATA16 intron4 (1-200) 180 TTCATGTTTCATAGCTCTTAA 200
Mouse Spata16 intron4 (1-200) 180 TTTTCATGTTTCATAGCTCTTAG 200
```

### Figure S3. Sequence similarity of the fourth intron of SPATA16.

Sequence alignment was used for the 1st to 200th nucleotides of fourth intron of *SPATA16*. Black indicates a match in humans and mice. 88% of the nucleotide sequence is identical between humans and mice.

# Table S1 (Fujihara et al)

**Table S1. List of primer sequences**

| Figure             | Sequence (5' to 3')                     | Name                    |
|--------------------|-----------------------------------------|-------------------------|
| 1A, 1B, 2D, 3D, 3E | GGAGCAGCTCTGGGGAAACCC                   | <i>Spata16</i> , Pr.c/d |
|                    | CCAGTCGGCTGTCTGCGGC                     |                         |
| 1A, 1B             | AAGTGTGACGTTGACATCCG                    | <i>Actb</i>             |
|                    | GATCCACATCTGCTGGAAGG                    |                         |
| 1B                 | GGGAGTCAGTTAGGAGGTCTGATTACAGTAG         | <i>Dpy19l2</i>          |
|                    | CTGAAATTTGCTTGGCTCAATGTATCCCAC          |                         |
|                    | GGCTCGAGCCCGCTTCTC                      | <i>Pick1</i>            |
|                    | GCCTTGGTTAGGGCCATAGGC                   |                         |
|                    | GTTATACTGACAAATGACTCAGCAGTCTTGG         | <i>Spaca1</i>           |
|                    | CATAGAGCTCAGCTCGGACTGTATCTC             |                         |
| 2A                 | AGGTGAGCGCATGTGCAAGG                    | 5'-arm                  |
|                    | GATATCTCTCCAGACATCTAAACACGG             |                         |
|                    | GATACTCAGAAGCTGCCCAGTATGTTTGTACAACTTCTG | 3'-arm                  |
|                    | TCTGGGGCTGAGAACATTAGC                   |                         |
| 2B, 3B, 3C         | GCCCACTCTGGTTAACTGGGACCC                | Pr.a/b                  |
|                    | GGGTGCCAAGGACCCAACTCAG                  |                         |
| 2C                 | CTACGTCAGTGCTGCCAAGTAGC                 | Point mutation          |
|                    | CCATCATCACTAATGACCTCATGGCTGG            |                         |
